# Supplementary material
Source: HighWire-hosted journal article supplement (https://bmjopen.bmj.com/content/15/1/e087468)
Supplement: inline-supplementary-material-1 [file inline-supplementary-material-1.pdf]

Supplementary File 1: Template Data Extraction Form

| Category                                                    | Extraction Point                                                  | Results |
|-------------------------------------------------------------|-------------------------------------------------------------------|---------|
| General Information                                         | Name of App                                                       |         |
|                                                             | Name of Reviewer and App Format (i.e., Apple or Android)          |         |
|                                                             | Reviewer and App Format for Verification (i.e., Apple or Android) |         |
|                                                             | Did the App Become Unavailable During the Screening Process?      |         |
|                                                             | Number of Downloads                                               |         |
|                                                             | Date Last Updated                                                 |         |
|                                                             | Average User Reviews (out of 5)                                   |         |
|                                                             | Developer Country                                                 |         |
|                                                             | App Category (e.g., Health & Fitness, Reference, etc.)            |         |
|                                                             | Suggested Age Range                                               |         |
|                                                             | Can User Create an Account (e.g., Login Details)                  |         |
|                                                             | Ability to Save Content in the App                                |         |
|                                                             | Can App Content be Password Protected?                            |         |
|                                                             | Who is the Target User?                                           |         |
|                                                             | Are There App Instructions for Users?                             |         |
|                                                             | Reviewer Experienced Errors When Trying Out App                   |         |
|                                                             | Content Available in Additional Languages to English              |         |
| FRAMEWORK DOMAIN 1:<br>General Information about<br>Suicide | Risk Factors for Suicide                                          |         |
|                                                             | Warning Signs                                                     |         |
|                                                             | General Information About Suicide                                 |         |
|                                                             | Myths About Suicide                                               |         |
|                                                             | General Information About Mental Health                           |         |
|                                                             | Information About Health Behaviours                               |         |
|                                                             | Information About Marginalised Groups                             |         |
|                                                             | Information for Carers/People Worried About Someone Else          |         |
|                                                             | Information on Life After Attempt/Recovery                        |         |
|                                                             | Information About Bereavement                                     |         |
|                                                             | Resources Related to COVID-19                                     |         |
|                                                             | Summary (Select If Any of the Sections Has a “Yes”)               |         |

|                                                          |                                                                                  |  |
|----------------------------------------------------------|----------------------------------------------------------------------------------|--|
| FRAMEWORK DOMAIN 2: Safety Planning                      | Customisable Safety Plan                                                         |  |
|                                                          | Pre-made Safety Plan (Without Customisation)                                     |  |
|                                                          | Can the Users’ Contacts be Linked to Safety Plan?                                |  |
|                                                          | Can Safety Plan be Shared Using App?                                             |  |
|                                                          | Summary (Select If Any of the Sections Has a “Yes”)                              |  |
| FRAMEWORK DOMAIN 3: Positivity and Inspiration           | Quotes from Individuals With Lived Experience                                    |  |
|                                                          | Reasons for Living                                                               |  |
|                                                          | Positive Messaging                                                               |  |
|                                                          | Summary (Select If Any of the Sections Has a “Yes”)                              |  |
| FRAMEWORK DOMAIN 4: Helpful Resources (for Help-seeking) | Information on Suicide Prevention Helplines                                      |  |
|                                                          | Information on Emergency Departments/Crisis Centres                              |  |
|                                                          | Information on General Mental Health Organisations/Helplines                     |  |
|                                                          | Information on Services Available for Marginalised Groups                        |  |
|                                                          | Organisations Can Be Personalised Using Location of User                         |  |
|                                                          | User Can Add Own Support Contacts                                                |  |
|                                                          | Summary (Select If Any of the Sections Has a “Yes”)                              |  |
| FRAMEWORK DOMAIN 5: Immediate Help-seeking               | Click to Access Emergency Support (Select If Either of the Sections Has a “Yes”) |  |
|                                                          | Single Click to Emergency Support on Home Screen                                 |  |
| FRAMEWORK DOMAIN 6: Wellness                             | Mindfulness Techniques/Meditation                                                |  |
|                                                          | Relaxation Techniques                                                            |  |
|                                                          | Information About Values and Setting Goals Towards These                         |  |
|                                                          | Journaling (NOT Including Mood Monitoring)                                       |  |
|                                                          | Summary (Select If Any of the Sections Has a “Yes”)                              |  |

|                                                            |                                                                                                             |  |
|------------------------------------------------------------|-------------------------------------------------------------------------------------------------------------|--|
|                                                            |                                                                                                             |  |
| FRAMEWORK DOMAIN 7:<br>Distraction & Alternate Activities  | Coping Strategies                                                                                           |  |
|                                                            | Distraction Techniques or Activities                                                                        |  |
|                                                            | Summary (Select If Any of the Sections Has a “Yes”)                                                         |  |
|                                                            |                                                                                                             |  |
| FRAMEWORK DOMAIN 8:<br>Screening Tools                     | Mood Monitoring                                                                                             |  |
|                                                            | Tracked Mood Monitoring (e.g., Provides Reports Over Time)                                                  |  |
|                                                            | Screening for Mental Health Conditions or Suicide Risk or Suicidal Thoughts/Behaviours                      |  |
|                                                            | Summary (Select If Any of the Sections Has a “Yes”)                                                         |  |
|                                                            |                                                                                                             |  |
| Extraction Points from Service User and Staff Consultation | Can the App Be Linked to Clinician/Medical Records?                                                         |  |
|                                                            | Is There Content for Carers/People Concerned?                                                               |  |
|                                                            | Are There Accessibility Options?                                                                            |  |
|                                                            | Is App Content Shown in Multiple Formats (e.g., Text/Videos/Audio)?                                         |  |
|                                                            | Can Users’ Own Resources Be Added (e.g, Pictures, Audio)?                                                   |  |
|                                                            | Does the App State They Are Collecting Data on User? (Reviewer to Search in Privacy Policy if One is Given) |  |
|                                                            | Does App Ask for Consent (e.g., Agree to Terms and Conditions)?                                             |  |
|                                                            | Privacy/Data Policy in App Store                                                                            |  |
|                                                            | Privacy/Data Policy in App                                                                                  |  |
|                                                            | Does App Provide Notifications?                                                                             |  |
|                                                            | Can the Appearance of the App Be Personalised?                                                              |  |
|                                                            |                                                                                                             |  |
